# Supplementary material for: The potential of near real-time monitoring of β-d-glucuronidase activity to establish effective warning systems in urban recreational waters
Source: Royal Society of Chemistry journal article supplement (doi:10.1039/d3ew00141e), 2023-01-01
Supplement: d3ew00141e1.pdf [file d3ew00141e1.pdf]

# 1 Supplementary Material: The potential of near real-time 2 monitoring of $\beta$ -D-glucuronidase activity to establish effective 3 warning systems in urban recreational waters

4

## 5 1 Additional analyses

6

### 7 1.1 *Int. enterococci* and GLUC activity measurements

8

9 Fig. S1 shows the results for the *Int. Enterococci* at locations LAB 1 – LAB 6 and the BACTcontrol at  
10 location BACT 1 in 2020 (Fig. S1b) and 2021 (Fig. S1b). The hygienic limit for *int. enterococci* (400  
11 MPN/ 100ml) is regularly exceeded during major showers. For instance, the showers of 18 June and  
12 1 July 2020 resulted in increased bacteria concentrations at several measurement locations. It is  
13 observed, however, that various exceedances of the *int. enterococci* were generally not related to  
14 precipitation events, leading to ambiguous results. Similar results were obtained via regular  
15 sampling and laboratory analysis at location LAB 1 in 2021 (Fig. S1b). As mentioned in the main  
16 article, a direct relationship between the used enzyme ( $\beta$ -D-glucuronidase) in the BACTcontrol and  
17 *int. enterococci* cannot be established. The enzyme  $\beta$ -D-galactosidase is the suitable enzyme for  
18 coliforms.

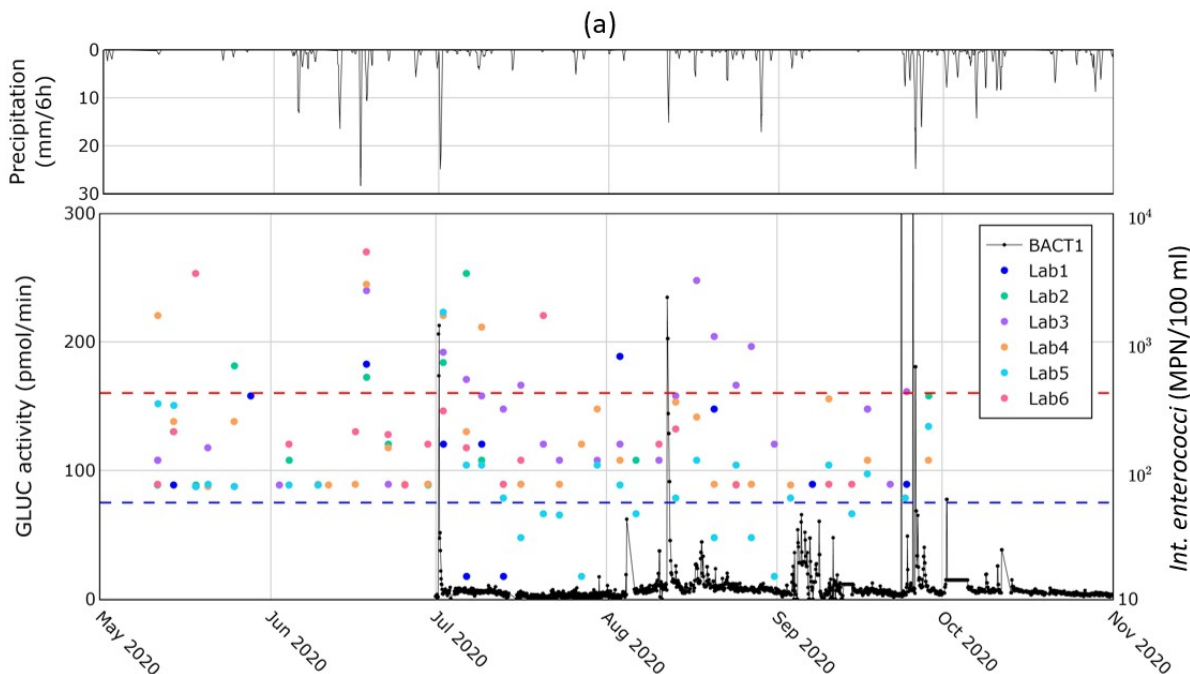

19

20

21

22

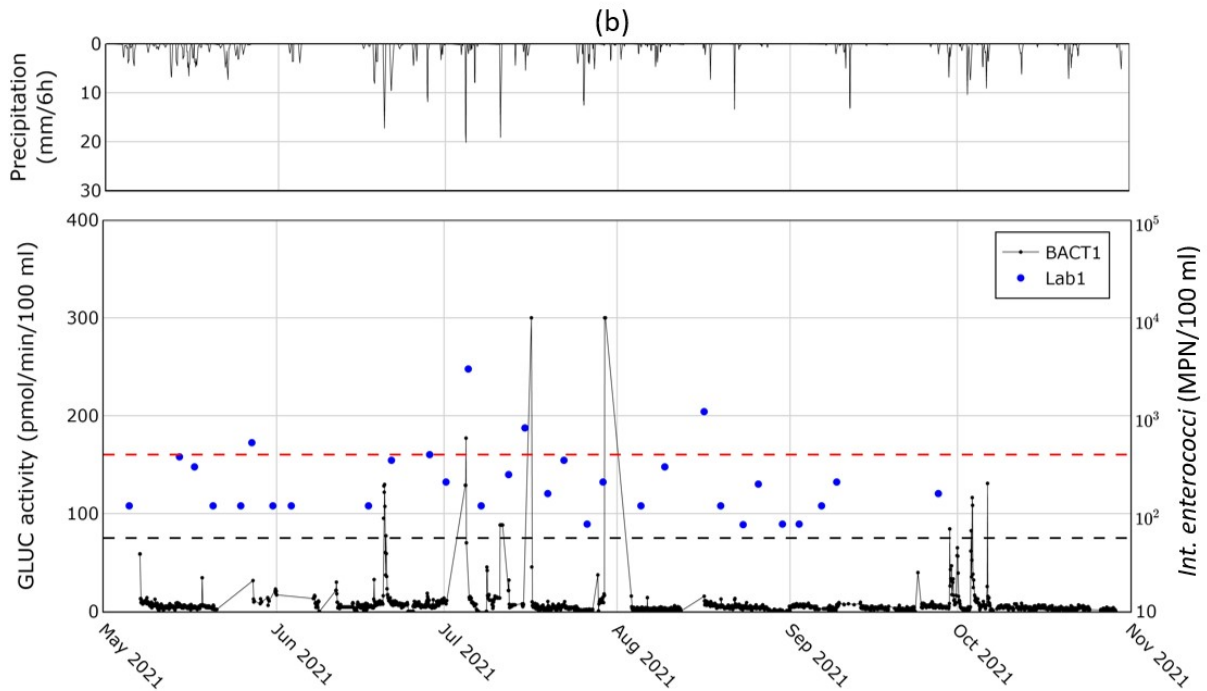

1  
 2 **Figure S1. GLUC activity recorded by the BACTcontrol and measured *int. enterococci* colonies at all**  
 3 **locations in 2020, b) GLUC activity recorded by the BACTcontrol and measured *int. enterococci***  
 4 **colonies at location LAB 1 in 2021. The graphs include the 6-hour sum of precipitation via radar**  
 5 **measurements. The red and black dashed lines show the established hygienic limit values for *E.***  
 6 ***coli* and GLUC activity, respectively.**

7

## 8 1.2 General water quality parameters

9

10 Additional water quality parameters were analyzed in order to explore the water quality of the  
 11 canals in Breda during warmer periods, in which lower quality is expected. Fig. S2 shows the results  
 12 of transparency and Chlorophyll-a content for the months of July and August 2020. The results  
 13 reveal a deterioration of water quality in mid-August 2020 which explains the variability in the  
 14 BACTcontrol measurements observed at the same period. This variability was used in this research  
 15 to set the hygienic limit for the BACTcontrol in the specific water system (75 pmol/ min/ 100ml).

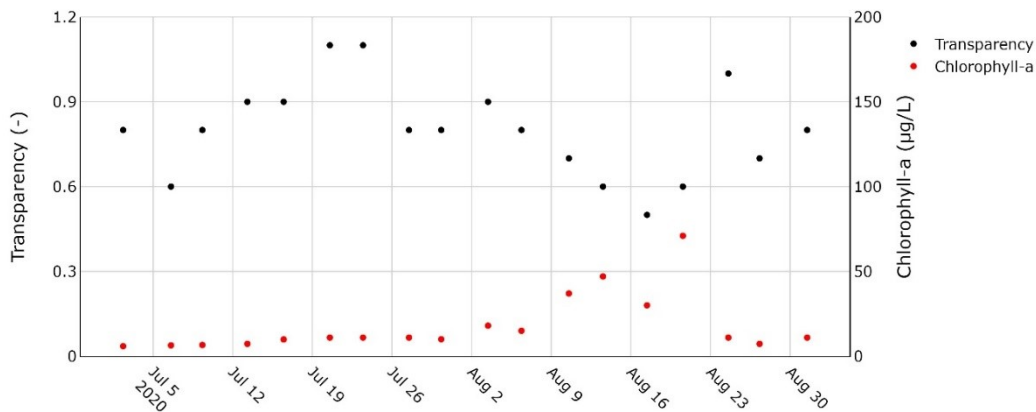

16

17 **Figure S2. Measurements of transparency (left axis) and Chlorophyll-a (right axis) at location LAB 1**  
 18 **during summer in 2020.**
